# Supplementary material
Source: PubMed Central journal article supplement (PMC2852006)
Supplement: 0912903107_pnas.0912903107_SI.pdf [file 0912903107_pnas.0912903107_SI.pdf]

# Supporting Information

Zhang et al. 10.1073/pnas.0912903107

## SI Text

**Theoretical Yield Calculation.** To calculate the theoretical yield of homoalanine from glucose, MATLAB software with linear programming optimization was used. We first establish a set of mass balance equations describing all the relevant intracellular metabolites in terms of input and output fluxes. The input glucose flux is set to 1, so that the yield of isobutanol is equal to the isobutanol flux ( $v_{iBOH}$ ) divided by 1. To calculate the maximal theoretical yield, we carry out the following minimization:

$$\min(-v_{iBOH}) \quad \text{such that} \quad AV = B.$$

Here  $A$  is the stoichiometric matrix (Table S2),  $V$  is the vector of flux in each reaction included, and  $B$  is the vector that consists of negative glucose input and zeros (Table S3). The rows of  $A$  and  $B$  correspond to each metabolite, and the columns of  $A$  correspond

to each reaction (or lumped reaction) considered (defined in Table S4).

To carry out this linear optimization problem, we used a MATLAB module "linprog", which uses the following formalism

$$\min_x f^T x \quad \text{such that} \quad A_{eq} x = b_{eq}.$$

To fit this formalism the  $f$  vector is defined in Table S4

After minimization,  $V_{10}$  is the maximum theoretical yield of isobutanol and the rest of the  $V$  (or  $x$ ) vector is the flux distribution over the metabolic network.

In this calculation, there are two degrees of freedom: (i) whether NADH can be converted to NADPH by transhydrogenase, and (ii) the P/O ratio (number of ATP obtained by oxidizing NAD(P)H). Table S5 shows the results of the maximum theoretical yield for various combinations of these two variations.

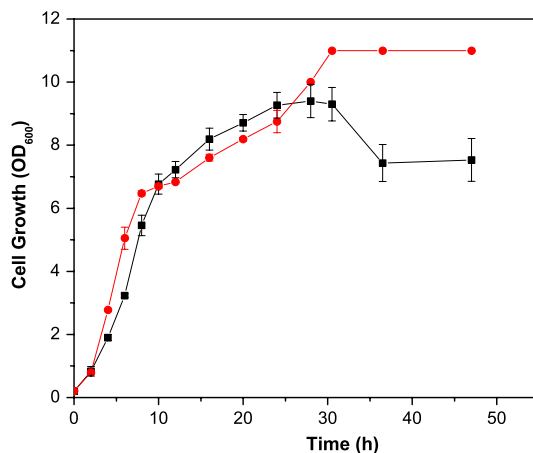

**Fig. S1.** Time courses for the growth of *E. coli* strains.  $OD_{600}$ , optical density at 600 nm. Cells were incubated in production medium at 33 °C. Circles, wild-type strain ATCC98082 with pZS\_thrO; diamonds, best production strain ATCC98082 ( $\Delta rhtA$ ) with pZS\_thrO and pZElac\_ilvA<sub>85</sub>\_GDH. Error bars: standard deviations from three independent experiments.

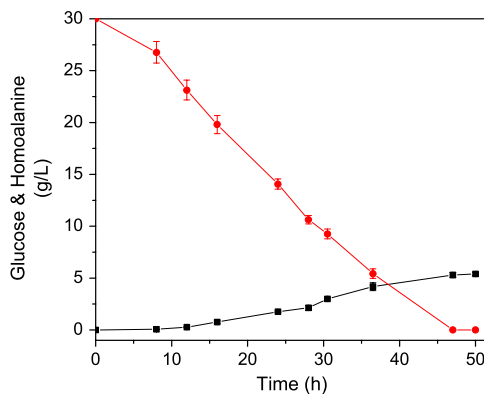

**Fig. S2.** Time courses for the production of L-homoalanine. Diamonds, L-homoalanine concentration; circles, residual glucose concentration. Error bars: standard deviations from three independent experiments.

**Table S1. Synthetic oligonucleotides for plasmid construction**

| Name            | Sequence                                                        |
|-----------------|-----------------------------------------------------------------|
| IlvEaccfwd      | GCATACGGTACC ATGACCACGAAGAAAGCTGATTACATTTG                      |
| IlvExabrev      | GCATACTCTAGA TTATTGATTAAGTTGATCTAACCAGCCCAT                     |
| Vdhsaaccfwd     | GCATACGGTACC ATGACCGATGTATCCGACGGCGT                            |
| Vdhsaxbrev      | GCATACTCTAGA TTAGCCCCGGCGGGCCTCCGCCATG                          |
| Vdhsaccfwd      | GCATACGGTACC ATGACCGACGTAAACGGCGCACC                            |
| Vdhsxbrev       | GCATACTCTAGA TTACGGCCGGGACGGGCTCCGCCATC                         |
| Vdhsfacfwd      | GCATACGGTACC ATGACCGACGCTCCACCCAC                               |
| Vdhsfxbrev      | GCATACTCTAGA TTAGACGGTGCGGGCCTCCGCCATG                          |
| GDHecaccfwd     | GCATACGGTACC ATGGATCAGACATATTCTCTGGAGTCATT                      |
| GDHecxbrev      | GCATACTCTAGA TTAAATCACACCCTGCGCCAGC                             |
| GDH_k92lib      | GCTCTGCCATCGGCCGTACNNKGGCGGTATGCGCTCCATCCG                      |
| GDH_k92lib_rev  | CGGATGGAAGCGCATACCGCCMNNGTACGGGCGGATGGCAGAGC                    |
| GDH_T195lib     | CAACAATACCGCCTGCGTCTTCNNKGGTAAGGGCCTTCATTTGG                    |
| GDH_T195lib_rev | CCAAATGAAAGGCCCTTACMNNGAAGACGCAGGGCGGTATTGTTG                   |
| GDH_VSlib       | GTAAAGCGGCTAATGCTGGTGGCANNKGTACANNKGGCCTGGAAATGGCACAAAAC        |
| GDH_VSlib_rev   | GTTTTGTGCCATTTCCAGGCCMNNNTGTAGCMNNNGCCACCAGCATTAGCCGCTTTAC      |
| GDHecalfwd      | GCATAC GTCGAC AAGAGGAGAAAAGTTACC ATGGATCAGACATATTCTCTGGAGTCATTC |
| TdcBaccfwd      | GCATACGGTACC ATGCATATTACATACGATCTGCCGGTTG                       |
| TdcBsalrev      | GCATAC GTCGAC TTAAGCGTCAACGAAACCGGTGATTTG                       |
| IlvAeccfwd      | GCATACGGTACC ATGGCTGACTCGCAACCCCTG                              |
| IlvAecsalrev    | GCATACGTCGAC CTAACCCGCCAAAAAGAACCTGA                            |
| IlvAbsaccfwd    | GCATACGGTACC ATGAAACCGTTGCTTAAAGAAAACCTCTCTC                    |
| IlvAbsalrev     | GCATACGTCGAC TTAGATTAGCAAATGGAACAAGTCCCTCATCC                   |
| GDHbamfwd       | GCATAC GGATCCATGGATCAGACATATTCTCTGGAGTCATT                      |
| GDHbamrev       | GCATAC GGATCCTTAAATCACACCCTGCGCCAGC                             |

**Table S2. A matrix**

| matrix A  | v1 | v2 | v3 | v4 | v5 | v6 | v7 | v8 | v9 | v10 | v11 | v12 | v13 | v14 | v15 | v16 | v17 | v18 | v19 | v20 | v21 | v22 | V <sub>NA</sub> | V <sub>AT</sub> | V <sub>CO</sub> | vpp | V <sub>na</sub> | V <sub>na</sub> | V <sub>na</sub> |
|-----------|----|----|----|----|----|----|----|----|----|-----|-----|-----|-----|-----|-----|-----|-----|-----|-----|-----|-----|-----|-----------------|-----------------|-----------------|-----|-----------------|-----------------|-----------------|
| Glucose   | -1 | 0  | 0  | 0  | 0  | 0  | 0  | 0  | 0  | 0   | 0   | 0   | 0   | 0   | 0   | 0   | 0   | 0   | 0   | 0   | 0   | 0   | 0               | 0               | 0               | 0   | 0               | 0               | 0               |
| G6P       | 1  | -1 | 0  | 0  | 0  | 0  | 0  | 0  | 0  | 0   | 0   | 0   | 0   | 0   | 0   | 0   | 0   | 0   | 0   | -1  | 0   | 0   | 0               | 0               | 0               | 0   | 0               | 0               | 0               |
| F6P       | 0  | 1  | -1 | 0  | 0  | 0  | 0  | 0  | 0  | 0   | 0   | 0   | 0   | 0   | 0   | 0   | 0   | 0   | 0   | 0   | 0   | 2   | 0               | 0               | 0               | 0   | 0               | 0               | 0               |
| F16BP     | 0  | 0  | 1  | -1 | 0  | 0  | 0  | 0  | 0  | 0   | 0   | 0   | 0   | 0   | 0   | 0   | 0   | 0   | 0   | 0   | 0   | 0   | 0               | 0               | 0               | 0   | 0               | 0               | 0               |
| GA3P      | 0  | 0  | 0  | 2  | -1 | 0  | 0  | 0  | 0  | 0   | 0   | 0   | 0   | 0   | 0   | 0   | 0   | 0   | 0   | 0   | 0   | 1   | 0               | 0               | 0               | 0   | 0               | 0               | 0               |
| PEP       | -1 | 0  | 0  | 0  | 1  | -1 | 0  | 0  | 0  | 0   | 0   | 0   | 0   | 0   | 0   | 0   | 0   | 0   | 0   | 0   | 0   | 0   | 0               | 0               | 1               | 0   | 0               | 0               |                 |
| Pyr       | 1  | 0  | 0  | 0  | 0  | 1  | 0  | 0  | 0  | 0   | -1  | 0   | 0   | 0   | 0   | 0   | 0   | 0   | 0   | 0   | 0   | 0   | 0               | 0               | -1              | 0   | 0               | 0               |                 |
| 6PG       | 0  | 0  | 0  | 0  | 0  | 0  | 0  | 0  | 0  | 0   | 0   | 0   | 0   | 0   | 0   | 0   | 0   | 0   | 0   | 1   | -1  | 0   | 0               | 0               | 0               | 0   | 0               | 0               |                 |
| R5P       | 0  | 0  | 0  | 0  | 0  | 0  | 0  | 0  | 0  | 0   | 0   | 0   | 0   | 0   | 0   | 0   | 0   | 0   | 0   | 0   | 1   | -3  | 0               | 0               | 0               | 0   | 0               | 0               |                 |
| OAA       | 0  | 0  | 0  | 0  | 0  | 0  | 1  | -1 | 0  | 0   | 0   | -1  | 0   | 0   | 0   | 0   | 0   | 1   | 0   | 0   | 0   | 0   | 0               | 0               | 0               | 0   | 0               | 0               |                 |
| ASP       | 0  | 0  | 0  | 0  | 0  | 0  | 0  | 1  | -1 | 0   | 0   | 0   | 0   | 0   | 0   | 0   | 0   | 0   | 0   | 0   | 0   | 0   | 0               | 0               | 0               | 0   | 0               | 0               |                 |
| THR       | 0  | 0  | 0  | 0  | 0  | 0  | 0  | 0  | 1  | -1  | 0   | 0   | 0   | 0   | 0   | 0   | 0   | 0   | 0   | 0   | 0   | 0   | 0               | 0               | 0               | 0   | 0               | 0               |                 |
| AceCoA    | 0  | 0  | 0  | 0  | 0  | 0  | 0  | 0  | 0  | 0   | 1   | -1  | 0   | 0   | 0   | 0   | 0   | 0   | 0   | 0   | 0   | 0   | 0               | 0               | 0               | 0   | 0               | 0               |                 |
| CoASH     | 0  | 0  | 0  | 0  | 0  | 0  | 0  | 0  | 0  | 0   | 0   | 1   | 0   | -1  | 1   | 0   | 0   | 0   | 0   | 0   | 0   | 0   | 0               | 0               | 0               | 0   | 0               | 0               |                 |
| Citrate   | 0  | 0  | 0  | 0  | 0  | 0  | 0  | 0  | 0  | 0   | 0   | 1   | -1  | 0   | 0   | 0   | 0   | 0   | 0   | 0   | 0   | 0   | 0               | 0               | 0               | 0   | 0               | 0               |                 |
| GA        | 0  | 0  | 0  | 0  | 0  | 0  | 0  | 0  | 0  | 0   | 0   | 0   | 0   | 0   | 0   | 0   | 0   | 0   | 1   | 0   | 0   | 0   | 0               | 0               | 0               | 0   | 0               | 0               |                 |
| 2KG       | 0  | 0  | 0  | 0  | 0  | 0  | 0  | 1  | 0  | 0   | 0   | 0   | 1   | -1  | 0   | 0   | 0   | 0   | -1  | 0   | 0   | 0   | 0               | 0               | 0               | 0   | 0               | 0               |                 |
| SucCoA    | 0  | 0  | 0  | 0  | 0  | 0  | 0  | 0  | 0  | 0   | 0   | 0   | 0   | 1   | -1  | 0   | 0   | 0   | 0   | 0   | 0   | 0   | 0               | 0               | 0               | 0   | 0               | 0               |                 |
| Succinate | 0  | 0  | 0  | 0  | 0  | 0  | 0  | 0  | 0  | 0   | 0   | 0   | 0   | 0   | 1   | -1  | 0   | 0   | 0   | 0   | 0   | 0   | 0               | 0               | 0               | 0   | 0               | 0               |                 |
| Fumarate  | 0  | 0  | 0  | 0  | 0  | 0  | 0  | 0  | 0  | 0   | 0   | 0   | 0   | 0   | 0   | 1   | -1  | 0   | 0   | 0   | 0   | 0   | 0               | 0               | 0               | 0   | 0               | 0               |                 |
| Malate    | 0  | 0  | 0  | 0  | 0  | 0  | 0  | 0  | 0  | 0   | 0   | 0   | 0   | 0   | 0   | 0   | 1   | -1  | 0   | 0   | 0   | 0   | 0               | 0               | 0               | 0   | 0               | 0               |                 |
| CO2       | 0  | 0  | 0  | 0  | 0  | 0  | 0  | 0  | 0  | 0   | 1   | 0   | 1   | 1   | 0   | 0   | 0   | 0   | 0   | 0   | 1   | 0   | 0               | 0               | -1              | 0   | 0               | 0               |                 |
| NADH      | 0  | 0  | 0  | 0  | 1  | 0  | 0  | 0  | 0  | 0   | 1   | 0   | 0   | 1   | 0   | 0   | 0   | 1   | 0   | 0   | 0   | 0   | -1              | 0               | 0               | 0   | -1              | 0               |                 |
| NADPH     | 0  | 0  | 0  | 0  | 0  | 0  | 0  | 0  | -2 | -1  | 0   | 0   | 1   | 0   | 0   | 0   | 0   | 0   | -1  | 1   | 1   | 0   | 0               | 0               | 0               | 0   | 1               | 0               |                 |
| ATP       | 0  | 0  | -1 | 0  | 1  | 1  | 0  | 0  | -2 | 0   | 0   | 0   | 0   | 0   | 1   | 0   | 0   | 0   | 0   | 0   | 0   | 0   | 0               | -1              | 0               | -1  | 0               | 3               |                 |

Table S3. B matrix

| Matrix B  | "-V <sub>in</sub> " |
|-----------|---------------------|
| Glucose   | -1.000              |
| G6P       | 0.000               |
| F6P       | 0.000               |
| F16BP     | 0.000               |
| GA3P      | 0.000               |
| PEP       | 0.000               |
| Pyr       | 0.000               |
| 6PG       | 0.000               |
| R5P       | 0.000               |
| OAA       | 0.000               |
| ASP       | 0.000               |
| THR       | 0.000               |
| AceCoA    | 0.000               |
| CoASH     | 0.000               |
| Citrate   | 0.000               |
| GA        | 0.000               |
| 2KG       | 0.000               |
| SucCoA    | 0.000               |
| Succinate | 0.000               |
| Fumarate  | 0.000               |
| Malate    | 0.000               |
| CO2       | 0.000               |
| NADH      | 0.000               |
| NADPH     | 0.000               |
| ATP       | 0.000               |

Table S4. *f* vector and the definition of fluxes

| Pathway              | Flux        | <i>f</i> |
|----------------------|-------------|----------|
| Glucose uptake (PTS) | v1          | 0.000    |
| Glycolysis           | v2          | 0.000    |
|                      | v3          | 0.000    |
|                      | v4          | 0.000    |
|                      | v5          | 0.000    |
|                      | v6          | 0.000    |
| ppc                  | v7          | 0.000    |
| V OAA → ASP          | v8          | 0.000    |
| v ASP → THR          | v9          | 0.000    |
| v THR → HA           | v10         | -1.000   |
| v Pyr → AceCoA       | v11         | 0.000    |
| TCA                  | v12         | 0.000    |
|                      | V13         | 0.000    |
|                      | v14         | 0.000    |
|                      | v15         | 0.000    |
|                      | V16         | 0.000    |
|                      | V17         | 0.000    |
|                      | v18         | 0.000    |
| v 2KG → Glu          | v19         | 0.000    |
| PPP                  | v20         | 0.000    |
|                      | v21         | 0.000    |
|                      | v22         | 0.000    |
|                      | VNADH-out   | 0.000    |
|                      | VNADPH-out  | 0.000    |
|                      | VATP-out    | 0.000    |
|                      | VCO2-out    | 0.000    |
|                      | Vpps        | 0.000    |
|                      | VNADH-NADPH | 0.000    |
|                      | VNADH-ATP   | 0.000    |
|                      | VNADPH-ATP  | 0.000    |

**Table S5. Summary of the theoretical yield for homoalanine production from glucose**

| Transhydrogenase (NADH → NADPH) | ATP/NAD(P)H | Theoretical yield     |                  |
|---------------------------------|-------------|-----------------------|------------------|
|                                 |             | Molar yield (mol/mol) | Mass yield (g/g) |
| YES                             | 1.5         | 1.188                 | 0.68             |
|                                 | 2.0         | 1.200                 | 0.69             |
|                                 | 3.0         | <b>1.226</b>          | <b>0.70</b>      |
| NO                              | 1.5 ~ 3.0   | 0.733                 | 0.42             |

Assumption: 1) Energy production from UQH2 derived from succinate dehydrogenase in TCA cycle was not included. 2) Nonoxidative branch of Pentose Phosphate Pathway was assumed  $3R5P \rightarrow 2F6P + GA3P$
